# Supplementary material
Source: PubMed Central journal article supplement (PMC6532785)

Figure 1A-B & Supplementary Figure S1

P-Akt (S473 & T308)

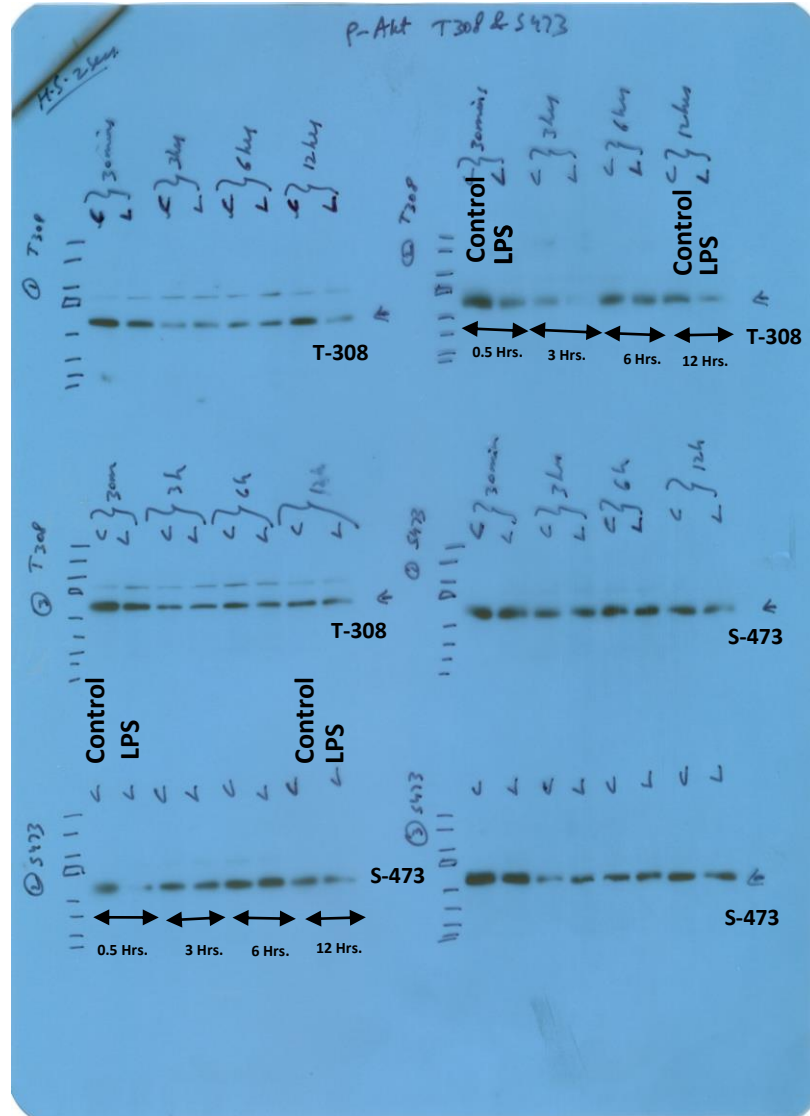

Actin Band

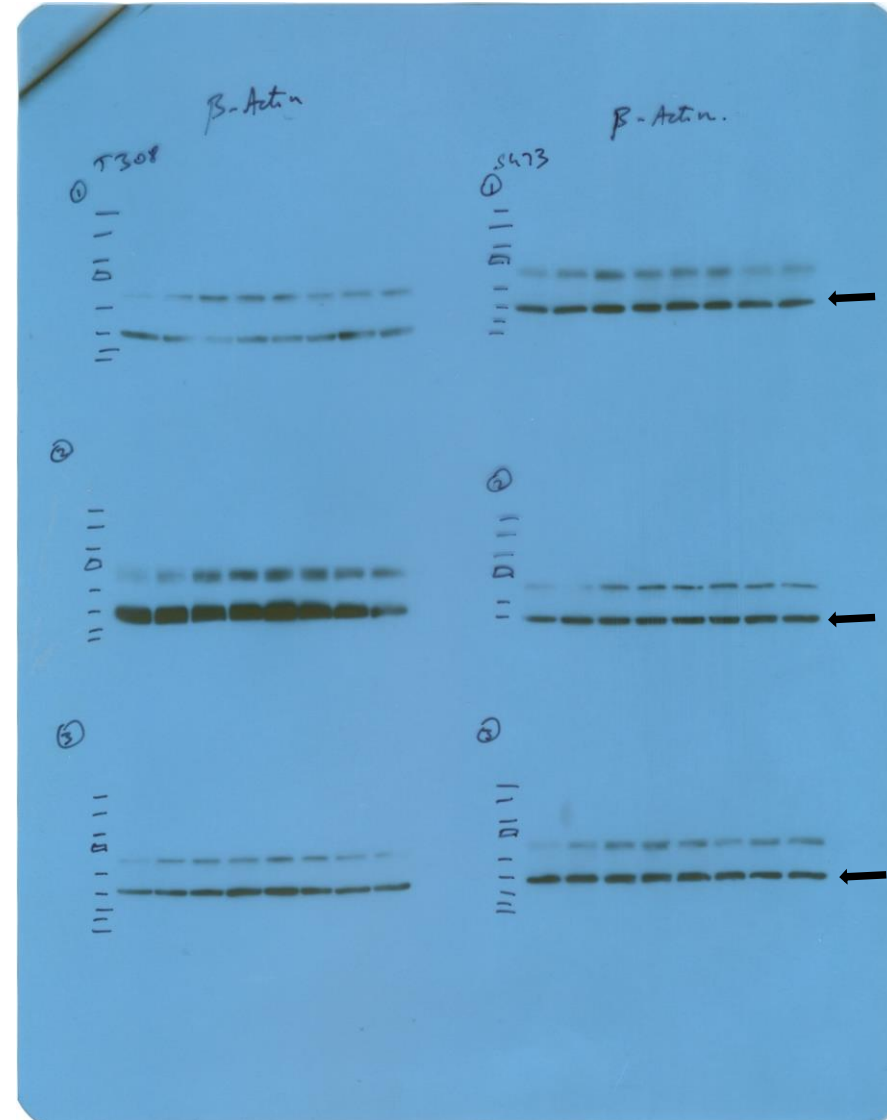

Figure 1C & 1F

P-FoxO1/3a in ECs

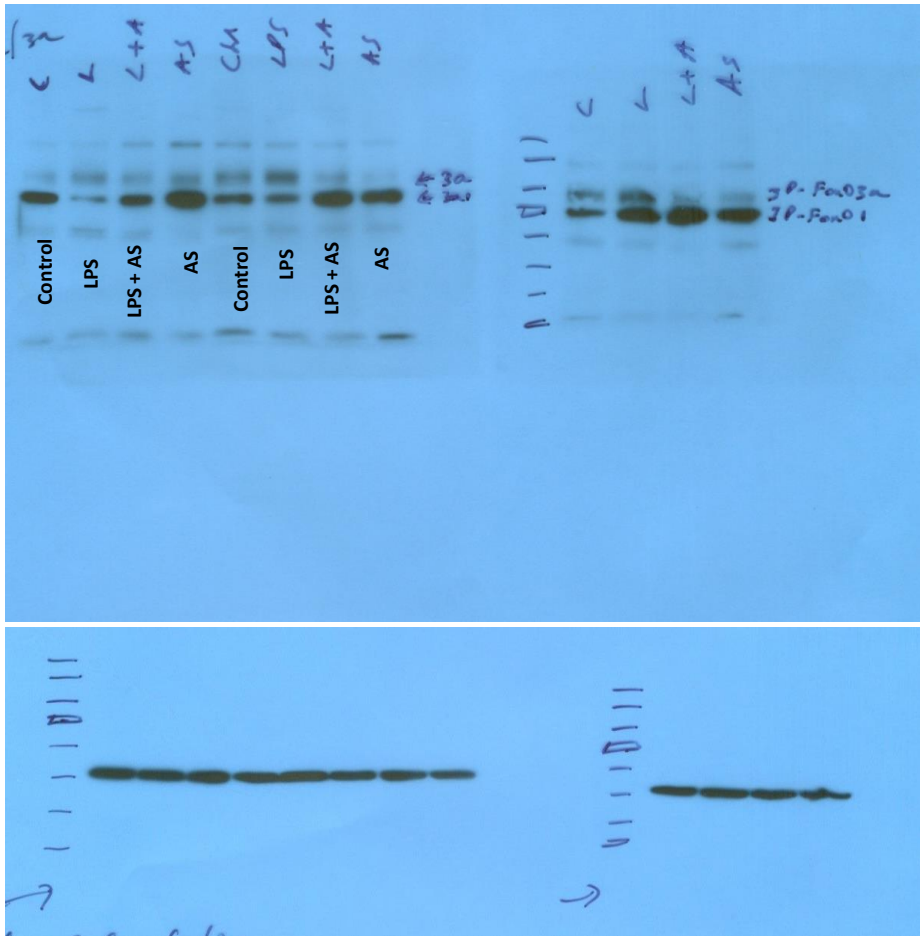

Claudin 5 in ECs

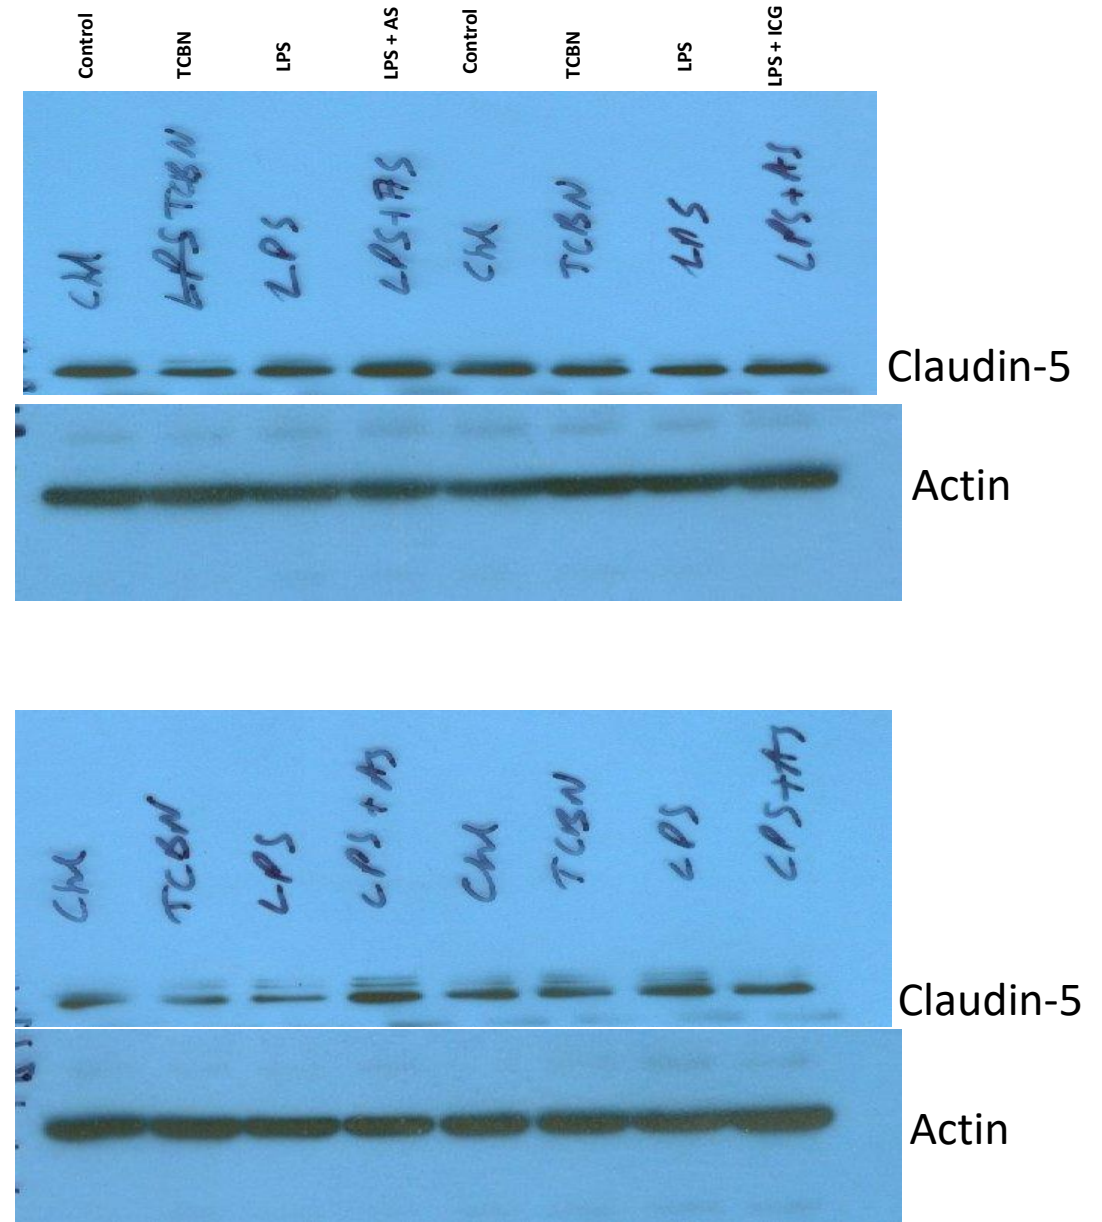

Figure 2

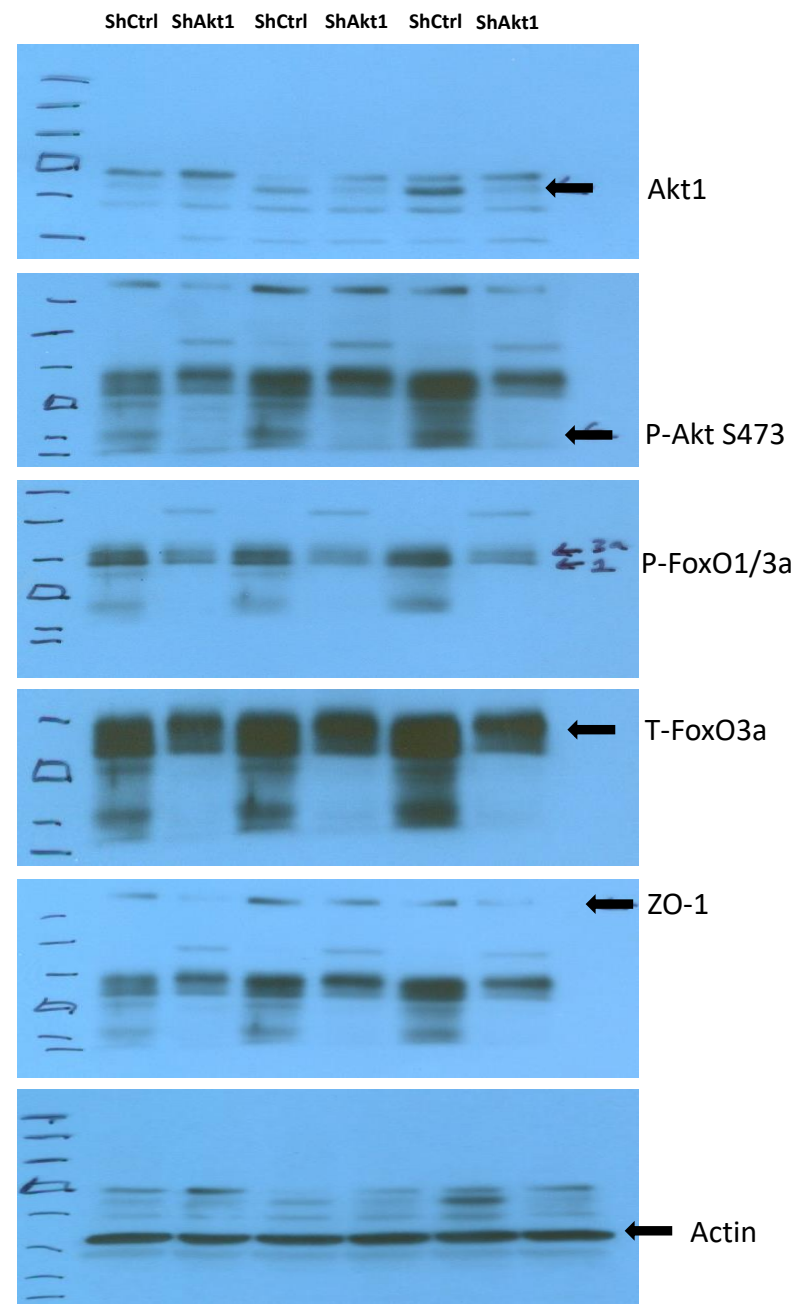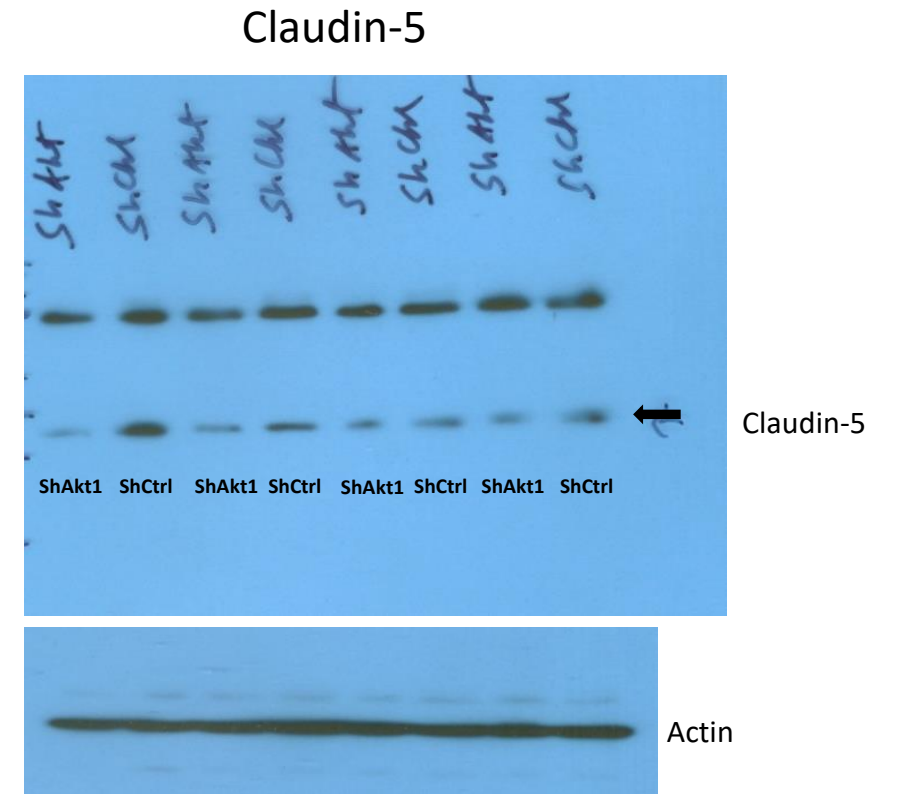



Figure 4B-C

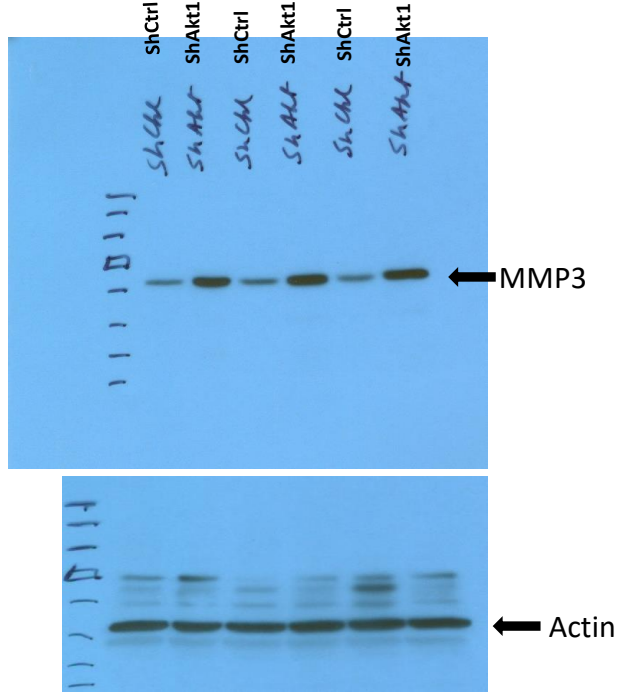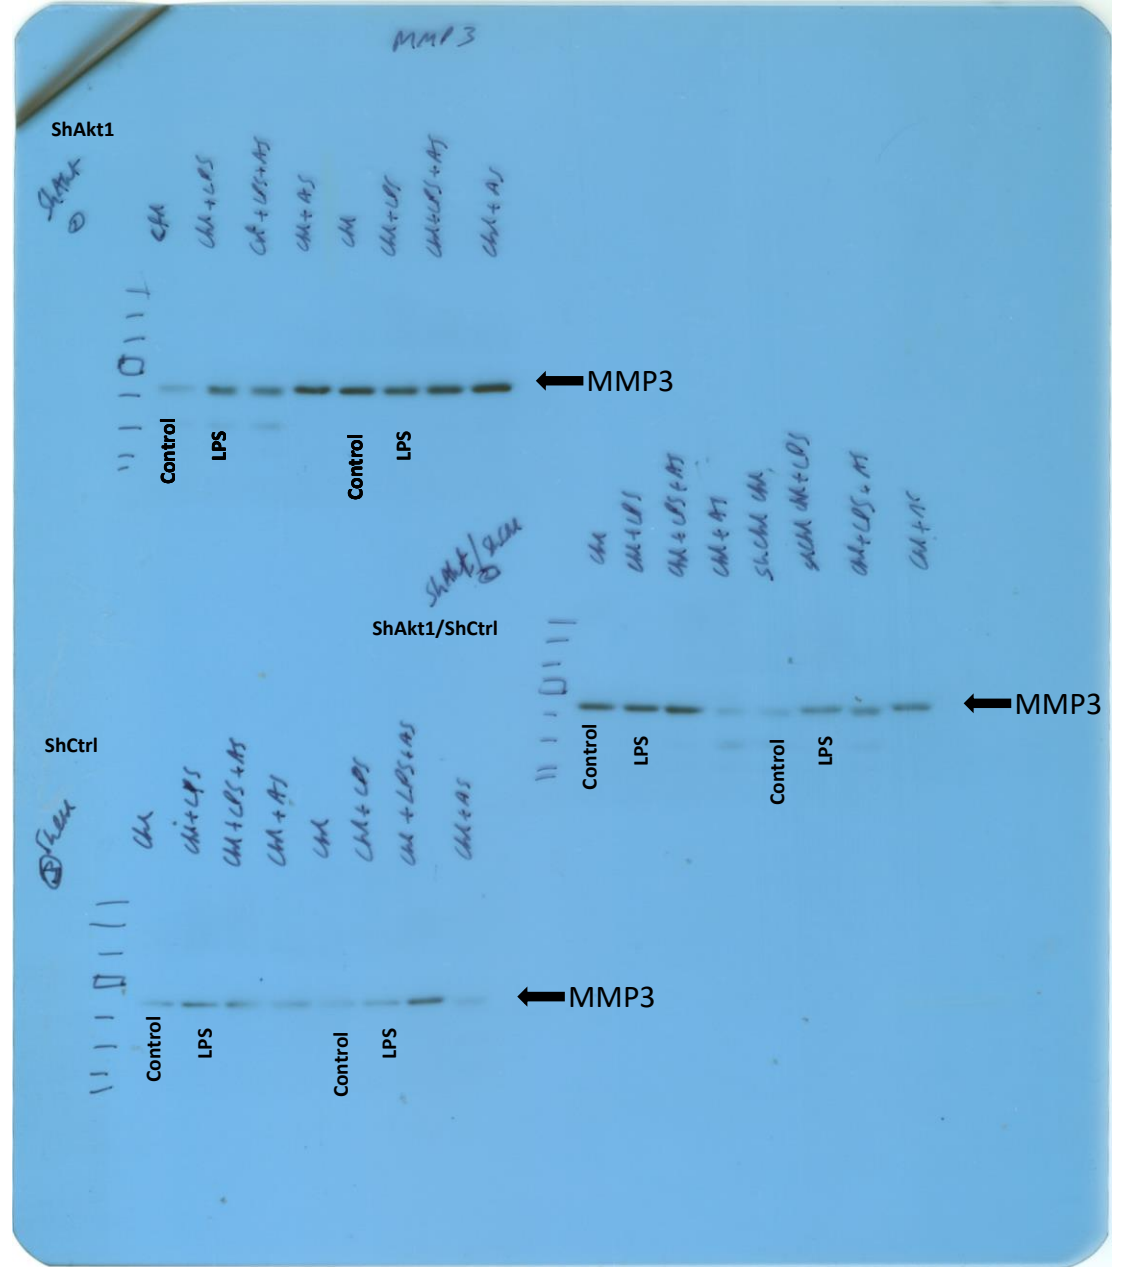

Figure 4D-E

MMP3 expression with treatments on ECs

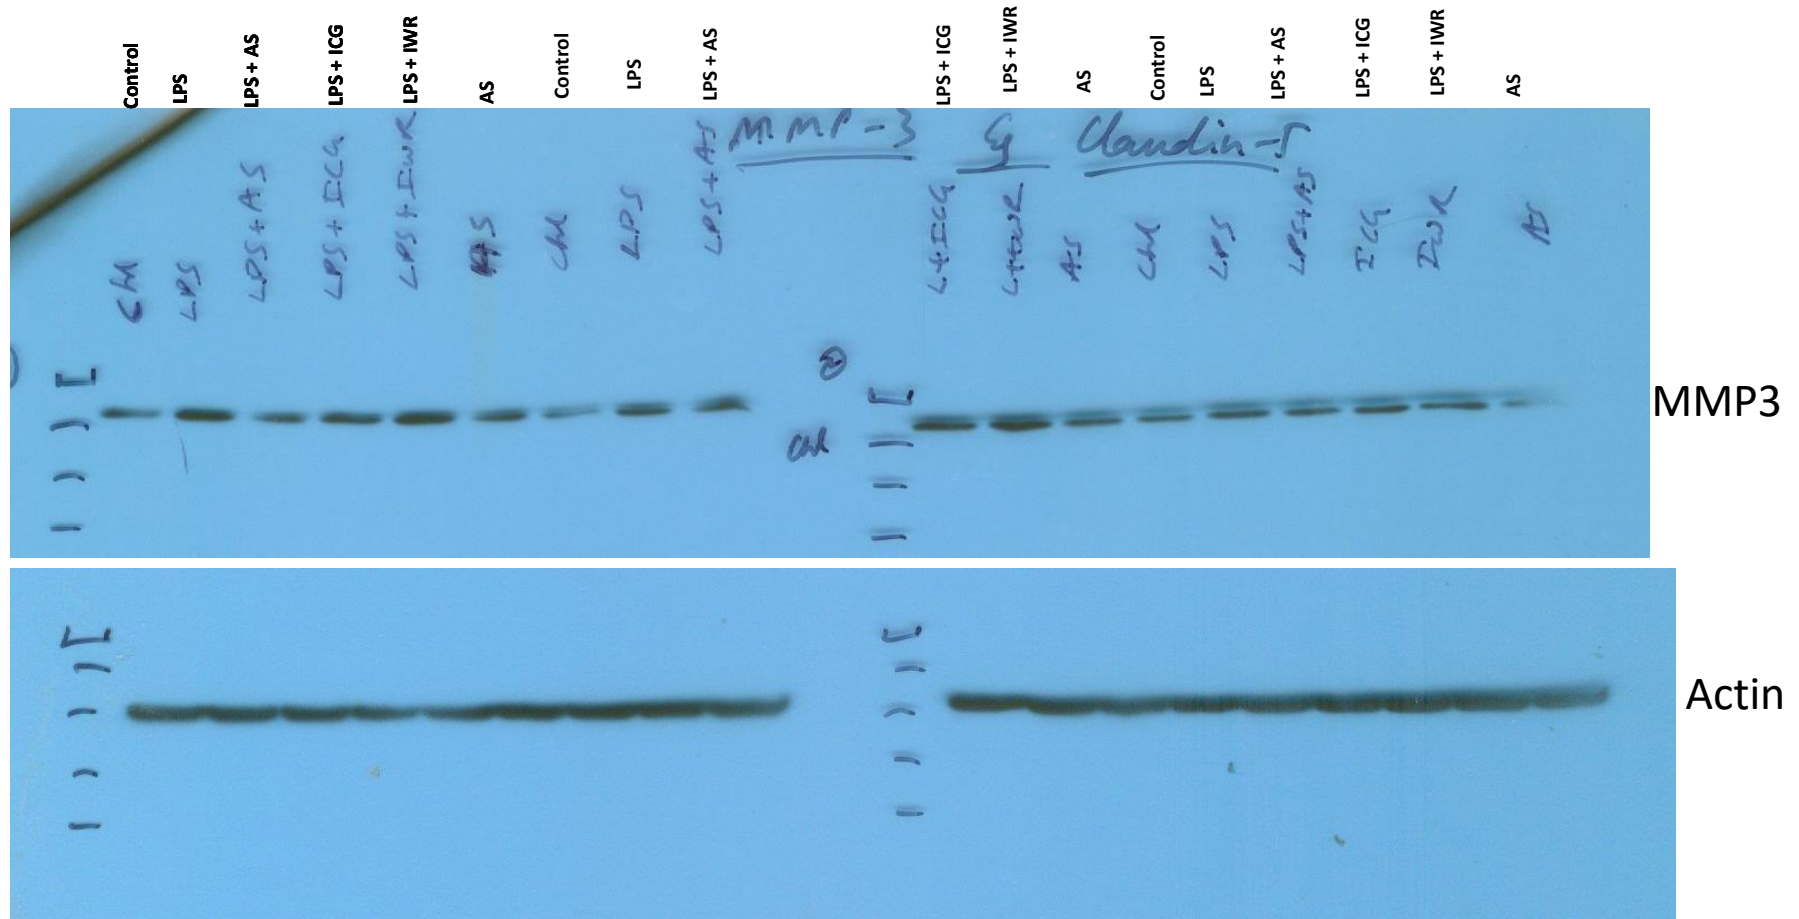

Figure 4i

Stromelysin1 (Mice Lungs)

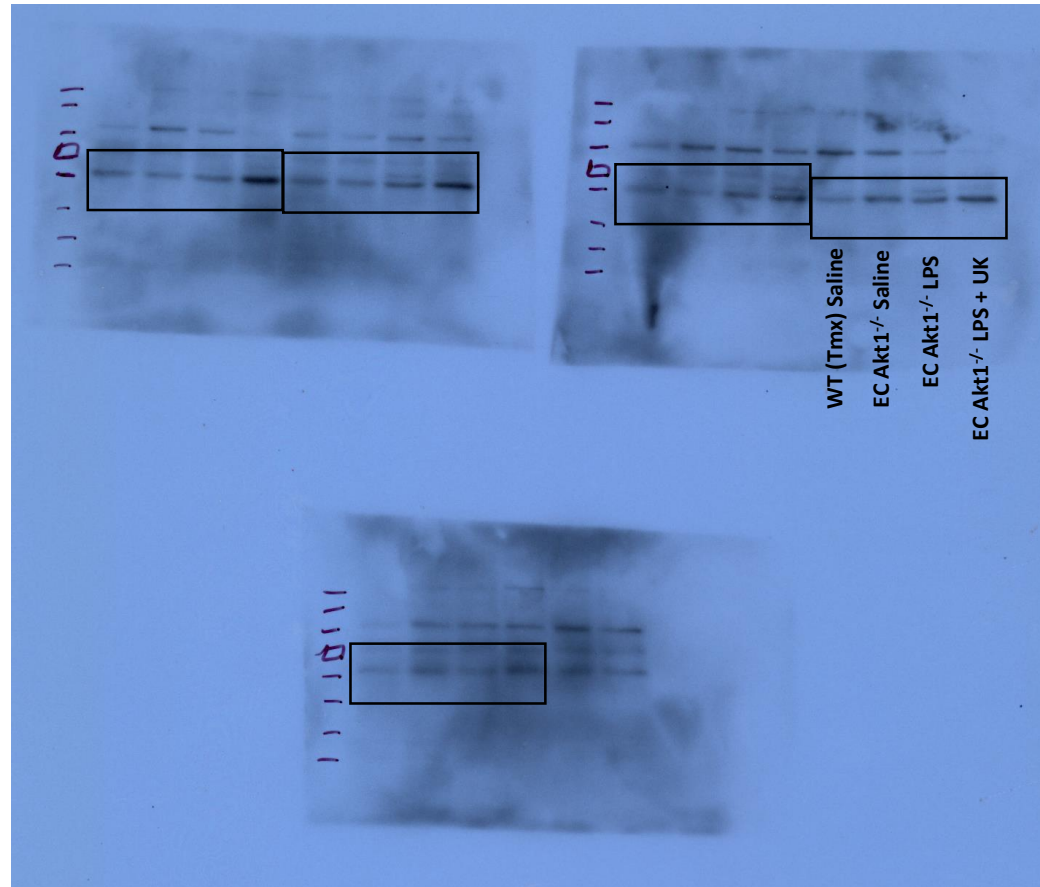

Actin (Mice Lungs)

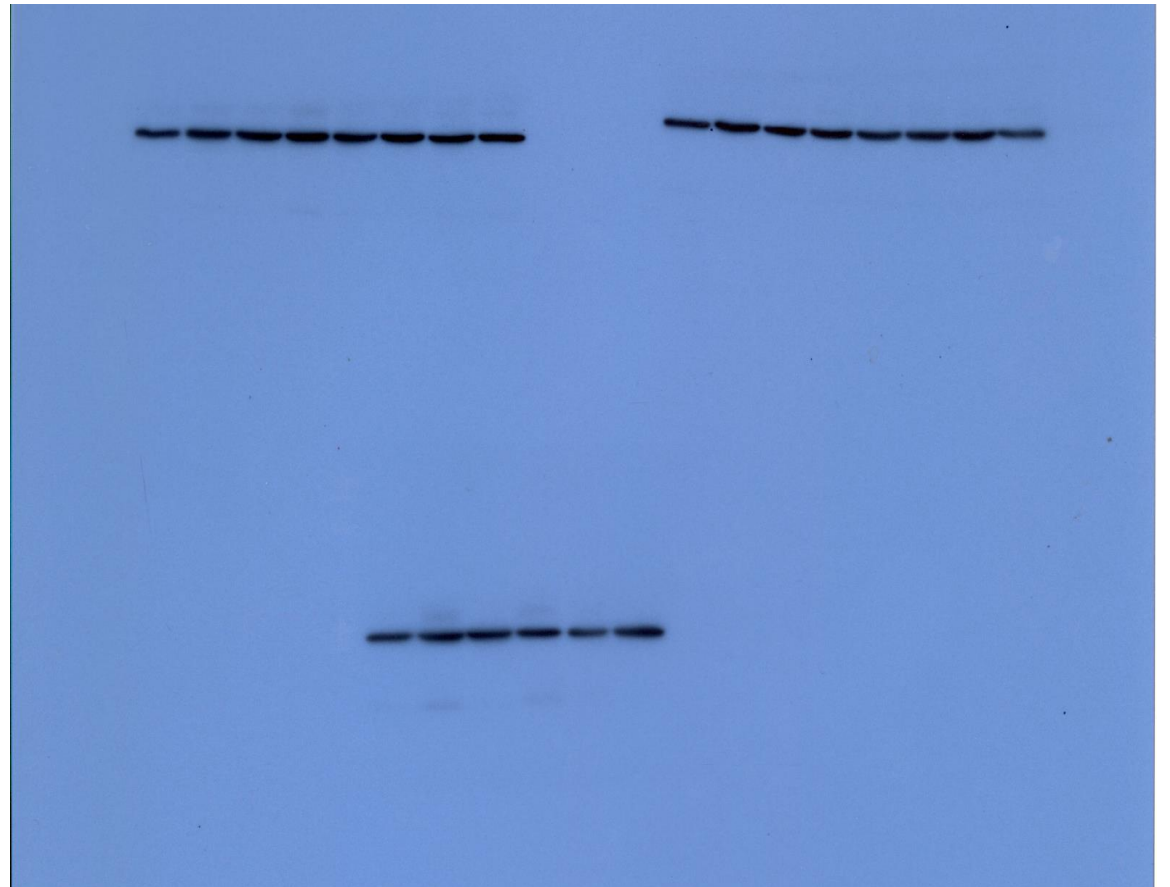





Figure 6F-G

Claudin 5 (Mice Lungs)

Actin (Mice Lungs)

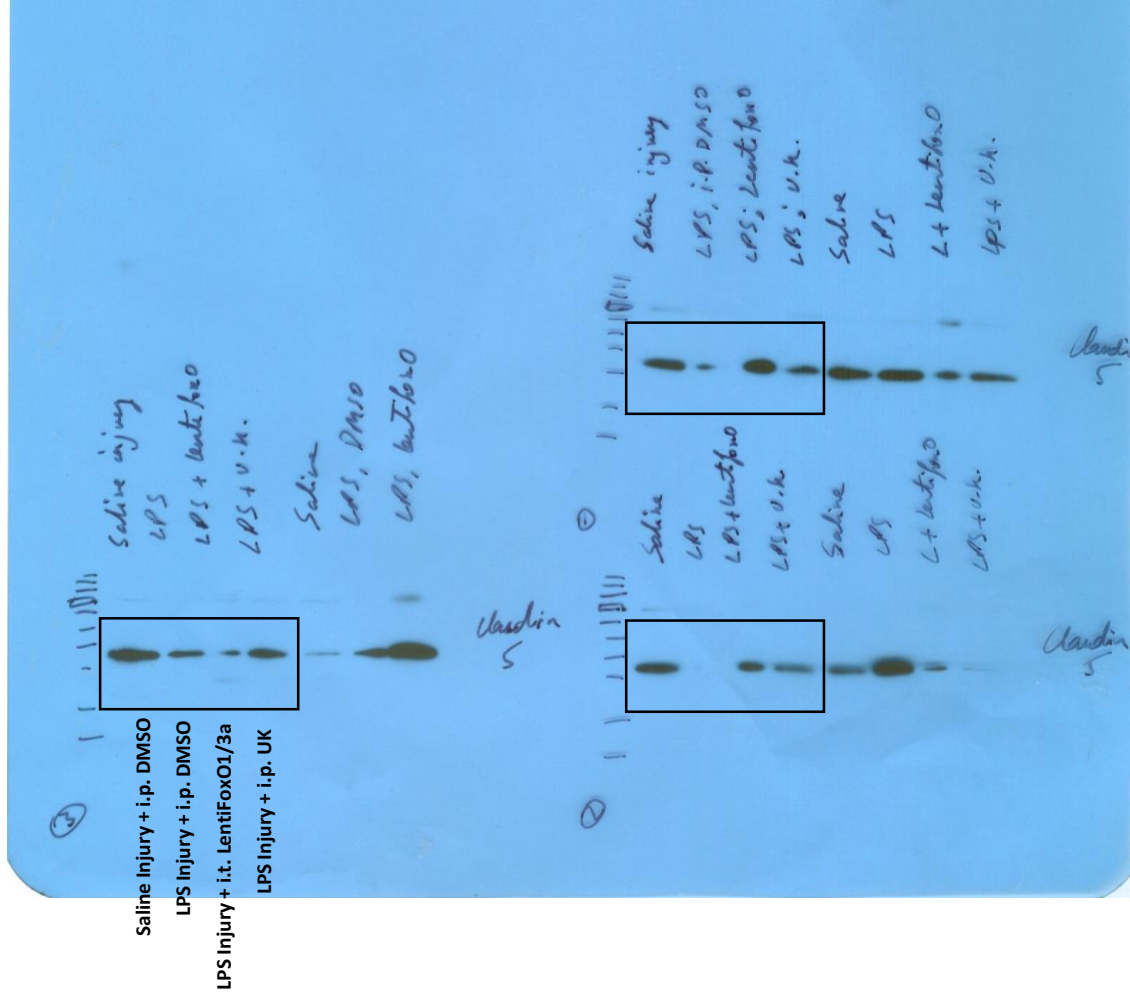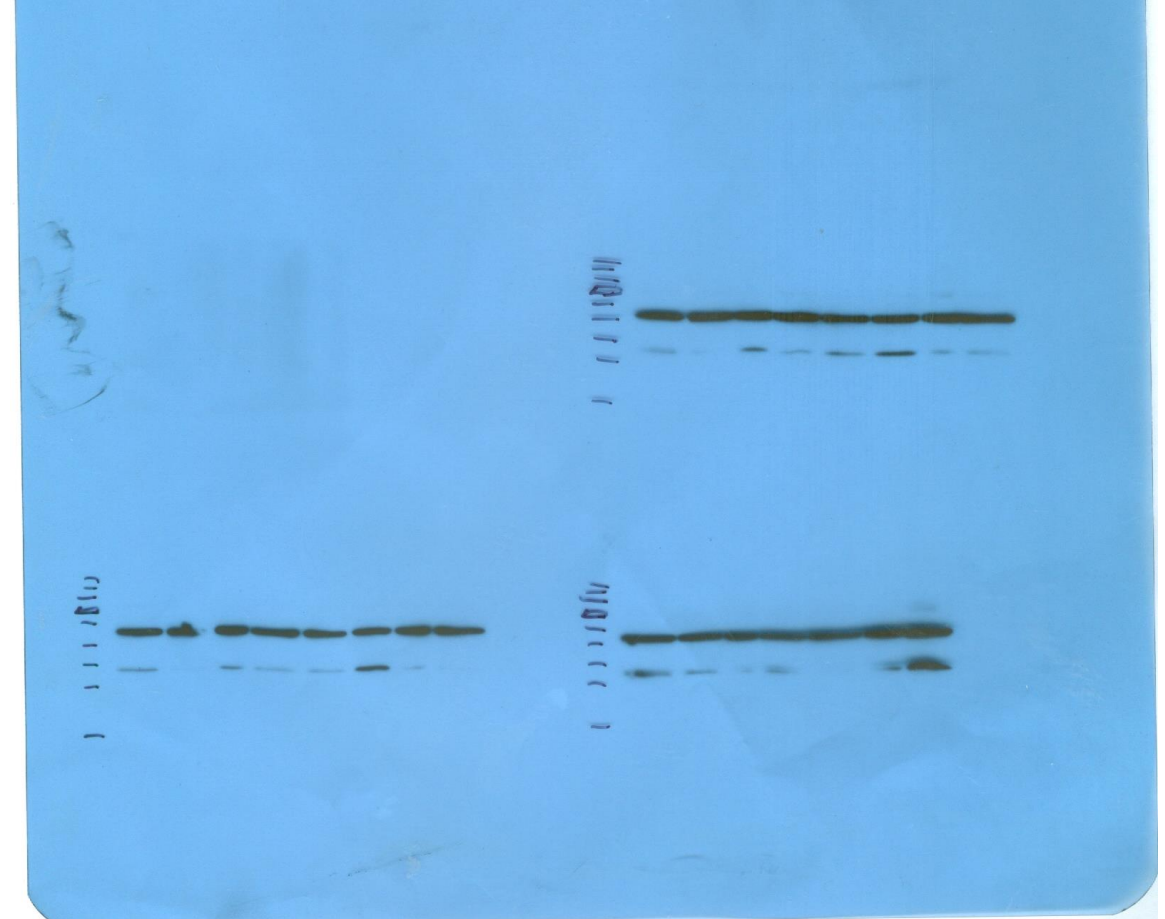

Figure S3B

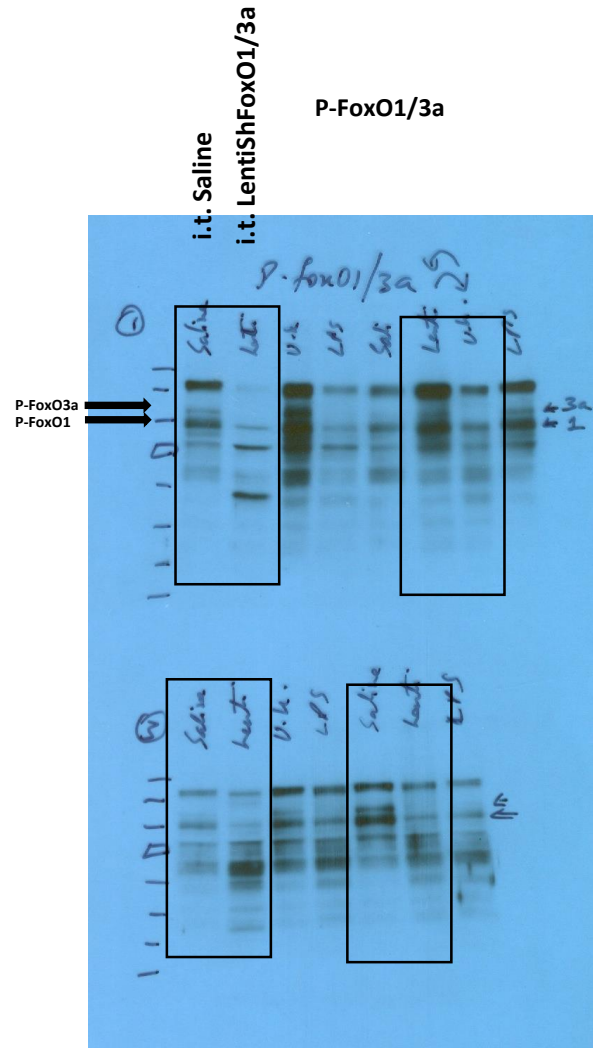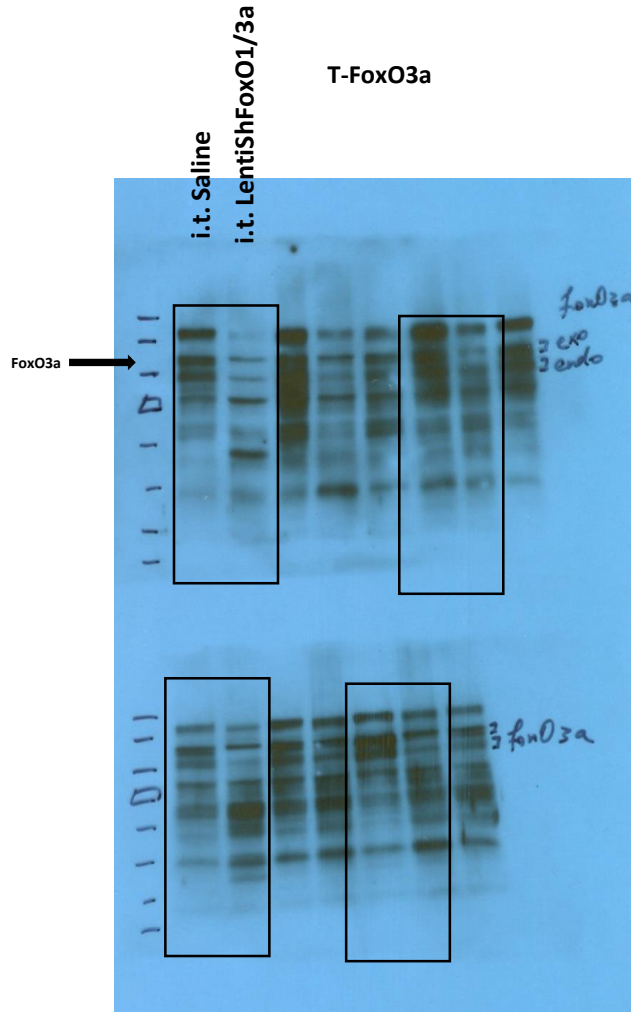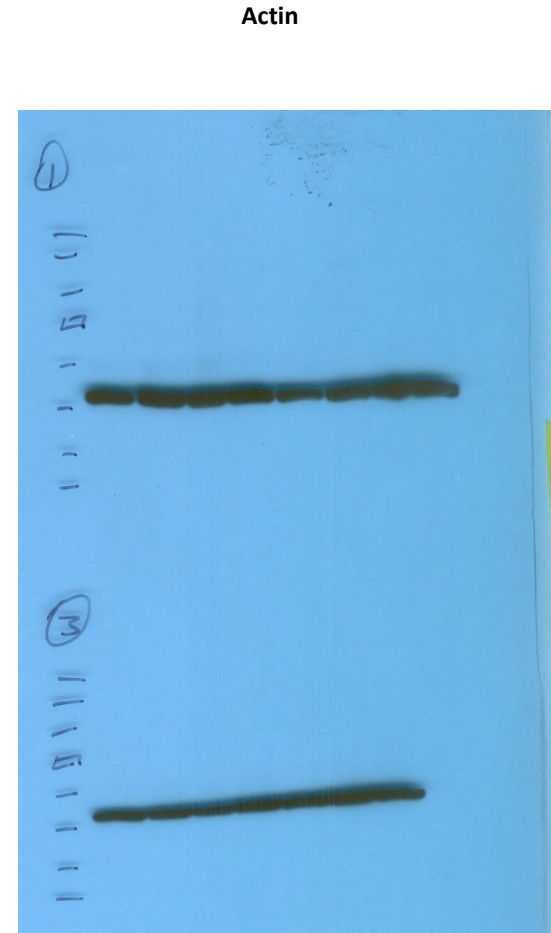

Supplement: NIHMS1518478-supplement-2.pdf [file NIHMS1518478-supplement-2.pdf]
